# Supplementary material for: Construction of C60-decorated SWCNTs (C60-CNTs)/bismuth-based oxide ternary heterostructures with enhanced photocatalytic activity
Source: Royal Society of Chemistry journal article supplement (doi:10.1039/c7ra11056a), 2017-01-01
Supplement: c7ra11056a1.pdf [file c7ra11056a1.pdf]

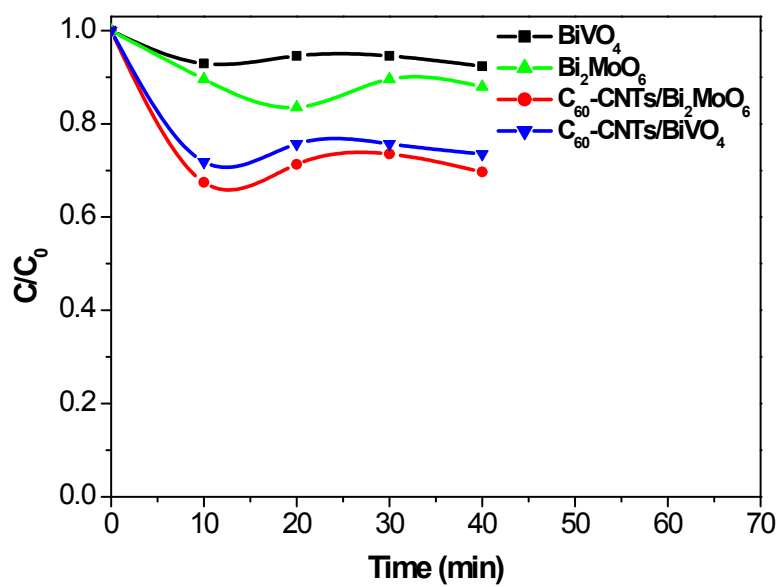

Fig. S1 The degradation curves of Rh B over different catalysts without visible light irradiation.
